# Sex-dependent resource defense in a nectar-feeding bat

Sabine Wintergerst<sup>1,2</sup>, York Winter<sup>1\*§</sup>, Vladislav Nachev<sup>1\*§</sup>

<sup>1</sup> Institut für Biologie, Humboldt Universität, Germany

<sup>2</sup> Fairchild Tropical Botanic Garden, 10901 Old Cutler Rd, Miami, FL 33156, USA

**\*For correspondence:** vladislav.nachev@hu-berlin.de, york.winter@charite.de

**Present Address:** <sup>§</sup>Institut für Biologie, Humboldt Universität, 10099 Berlin, Germany

## 8 Abstract

9 Aggressive resource defense spans from the transient monopolization of a resource up to the long-term  
10 maintenance of a territory. While such interference competition is common in nectar-feeding birds, reports in  
11 nectar-feeding bats are rare. *Glossophaga* bats have been observed to temporarily defend flowers but the  
12 extent of this monopolization, its effects on nectar intake, and underlying sexual differences remain unknown.  
13 We investigated resource defense behavior of *Glossophaga mutica* in the laboratory. We presented bats with  
14 two patches of computer-controlled artificial flowers and tracked individual nectar intake. Furthermore, we  
15 established an automated method for detecting aggressive interactions at the artificial flowers. Theoretical  
16 models of interference competition predict more aggressive interactions when resources are spatially more  
17 clumped. To test this, we varied resource distribution across two patches from clumped to distributed and  
18 monitored bats' interactions in one male, one female, and four mixed-sex groups. Males engaged in aggressive  
19 interactions more often than females and in each group some individuals defended clumped artificial flowers  
20 against others. Subordinate males experienced a substantial decrease in nectar intake, while females were  
21 only marginally affected by male aggression. These results suggest that aggressive interactions and their effect  
22 on nectar intake are sex-dependent in *G. mutica*. Furthermore, aggressive interactions were more frequent  
23 and resource defense was only successful when resources were clumped. Our experimental set-up allowed  
24 us to perform an automated test of models of interference competition with a mammal under controlled  
25 laboratory conditions. This approach may pave the way for similar studies with other animals.

## 26 Lay summary

27 Males bully other males to get more food, but only when food is easy to defend. When flowers are spread  
28 out nectar-feeding bats rarely engage in fights. However, when there are rich flowers in one spot and no  
29 flowers elsewhere, some males start attacking others, denying them access to the nectar. Females do not seem  
30 bothered by such male bullies, but when there are no males around, some females become bullies themselves.

## 31 Keywords:

32 resource defense, economic defendability, bat, *Glossophaga*

## 33 1. Introduction

34 Competition for limited resources like food or mates is a ubiquitous phenomenon in the animal kingdom.  
35 Such competition can be indirect by exploiting a common resource and preventing others from benefiting  
36 from it (Paton and Carpenter 1984); or it can be direct by aggressively defending a resource. The latter is  
37 known as interference competition (Amarasekare 2002). Aggressive resource defense by excluding competitors  
38 leads to priority of access to those resources and thus establishes dominance. One individual is dominant  
39 over another if it directs aggressive behavior towards it (chasing, threatening, biting, etc.) while receiving  
40 little or no aggression from the other (Chase et al. 2002). In the extreme, dominance behavior can lead to  
41 exclusive territoriality. Territoriality is a concept belonging to an indivisible continuum starting with the  
42 transient monopolization of a preferred feeding opportunity to the longer-term defense of an area as exclusive  
43 territory. The rules of economic defendability (Brown 1964) determine the adaptive compromise to which  
44 a species' dominance behavior will evolve and develop along this continuum. The establishment of feeding  
45 territories is well known for nectar-feeding birds (Boyden 1978; Carpenter and Macmillan 1976; Ewald and  
46 Carpenter 1978; Gill and Wolf 1975).

47 The cost of defense, a key parameter in the economic defendability equation, is likely much higher for a  
48 nocturnal, echolocating bat than for a diurnal, visually oriented bird. The successful resource defense is only  
49 possible after the competition is detected. Visual detection in the daylight works well over long distances.  
50 In contrast, for a nocturnal, echolocating bat, especially for phyllostomid bats that are able to echolocate  
51 with whispering calls (Howell 1974; Hörmann et al. 2020; Yoh et al. 2020), detecting intruders at a feeding  
52 territory's boundary would require expensive patrolling flights.

53 Within bats, the flower visitors have an additional advantage if they are intimately familiar with their  
54 feeding area. Compared to an insect-hunting bat that must continually scan for elusive prey by active  
55 echolocation, a flower visitor can approach a target with minimal echolocation when seeking specific flowers  
56 at known locations (Thiele and Winter 2005; Winter and Stich 2005; Gonzalez-Terrazas et al. 2016; Rose et  
57 al. 2016). Thus, it is not surprising that the longer-term defense of extensive feeding territories as commonly  
58 observed in nectar-feeding birds is not known for glossophagine, nectar-feeding bats (but see Watzke 2006 for  
59 nectar-feeding flying foxes). Nonetheless, several observations have documented aggressive food defense by  
60 glossophagine bats. The inflorescences of *Agave desmettiana* with their copious nectar (Lemke 1985) may be  
61 defended by males or females of *Glossophaga soricina* against conspecifics but only during some hours of the  
62 night (Lemke 1984, 1985). When left unguarded, intruders quickly exploited the opportunity to feed from  
63 the previously defended plants. The Costa Rican bat *Glossophaga commissarisi* occasionally defends and  
64 temporarily monopolizes single inflorescences of the understory palm *Calyptroglyne ghiesbreghtiana* against  
65 other hovering bats, perching bats and katydid (Tschapka 2003). A commonality in these reports was that  
66 the defense did not cover the area of a typical feeding range but was restricted to a single or a few flowering  
67 plants and was also limited to a small number of hours during the night. Still, glossophagine bats can show  
68 aggressive resource defense.

69 In this study, we investigated for a nocturnal, nectar-feeding mammal, the flower-visiting bat *Glossophaga*  
70 *mutica*, the role of aggressive interactions for gaining access to nectar food. We tested the predictions of models  
71 of resource defense (Grant et al. 2002) and interference competition (Grant 1993) using a naturalistic foraging  
72 paradigm in the laboratory. The occurrence of resource defense is predicted to be highest at intermediate  
73 levels of food abundance (Grant et al. 2002). In line with this prediction, the transient nature of nightly  
74 defense behavior observed in the field suggests that changes in food-abundance or food-requirements that  
75 occur within the night affected the strength of the observed behavior. To mimic the natural situation of  
76 chiropterophilous flowers many of which replenish their nectar more or less continuously throughout a night  
77 (e.g. Tschapka and Helversen 2007) we programmed artificial flowers to provide nectar with a fixed interval  
78 reward schedule. Once a nectar reward had been taken by any bat, the fixed interval had to pass before the  
79 next reward was available at this flower. Furthermore, theoretical models of interference competition predict  
80 that clumped resources lead to more agonistic behavior and resource defense than evenly distributed resources  
81 (Grant 1993). To include a test of this prediction in our experimental design, we spatially subdivided our  
82 flower field into two patches and programmed them to automatically change during the night the spatial  
83 distribution of available nectar resources. We performed our study with 36 individuals of male and female *G.*  
84 *mutica*. By using artificial flowers in a closed environment, we could track all flower visits and total nectar  
85 consumption of every individual in the group. Each individual carried an electronic ID tag and flowers were  
86 equipped with ID sensors. This also enabled us to detect and quantify a typical class of aggressive interactions  
87 between pairs of individuals directly at the artificial flowers fully automatically.  
88 Our novel experimental set-up thus allowed us to perform a mostly automated experimental test of models  
89 of interference competition and resource defense with a mammal under the controlled conditions of the  
90 laboratory. This new approach may pave the way for further such studies with other groups of organisms.

## 91 2. Materials and methods

### 92 (a) Subjects and housing

93 Experiments were conducted with 36 individuals of the small, (9-10g) neotropical nectarivorous bat species  
94 formerly identified as *Glossophaga soricina* (Pallas's long-tongued bat). In view of the recent taxonomic  
95 revision of the *G. soricina* species complex (Calahorra-Oliart, Ospina-Garcés, and León-Paniagua 2021), it is  
96 relevant to note that the founders of our colony used in this and all our previous studies were caught at the  
97 Cueva de las Vegas, Municipio de Tenampulco, Mexico and transported to Germany in 1988 by Otto von  
98 Helversen. Thus they belong to the species *G. mutica*. Bats came from our captive colony and were older  
99 than one year as judged by finger joint ossification (Brunet-Rossini and Wilkinson 2009). They carried radio  
100 frequency identification (RFID) tags attached to cable tie collars (total weight of collar with tag = 0.2g, max.  
101 2.4% of the body weight) that were removed after the experiment. Additionally, bats had numbered plastic  
102 split rings (A C Hughes Ltd., Middlesex, UK) around the forearm for visual identification. Temperature in  
103 the experimental and colony room was kept at 20-25°C, air humidity at 65-75%, and light conditions were

104 12:12 LD (light off at 16h).

## 105 (b) Experimental set-up

106 In the experimental room ten artificial flowers with automated nectar delivery (Winter and Stich 2005) were  
107 mounted along a 4.2m bar at a height of 1.2m (Fig. 1). The distance between flowers was 0.4m. Flowers were  
108 divided into two groups of five to simulate two flower patches. Each patch was enclosed by a sheet-covered  
109 frame around the four sides and at the top to separate the groups of flowers spatially (Fig. 1). The only  
110 entrance to the patches was a 0.4m gap between the ground and the bottom end of this enclosure (Fig. 1,  
111 dashed line). From this entrance bats had to fly up vertically to reach the flowers, which increased the costs  
112 of moving between patches. A stepper-motor syringe pump delivered nectar via tubes and pinch valves to  
113 the artificial flowers. Nectar rewards were triggered by the interruption of an infrared light barrier at the  
114 flower opening. The RFID reader below the flower head identified a bat's ID code. Flower visits (infrared  
115 light barrier interruptions) and ID sensor events were recorded during every experimental night. The reward  
116 schedule was configured using PhenoSoft Control (Phenosys GmbH, Berlin, Germany). Every detected event  
117 at a flower (including date, time, individual ID, duration of the event and amount of nectar delivered) was  
118 recorded for data analysis.

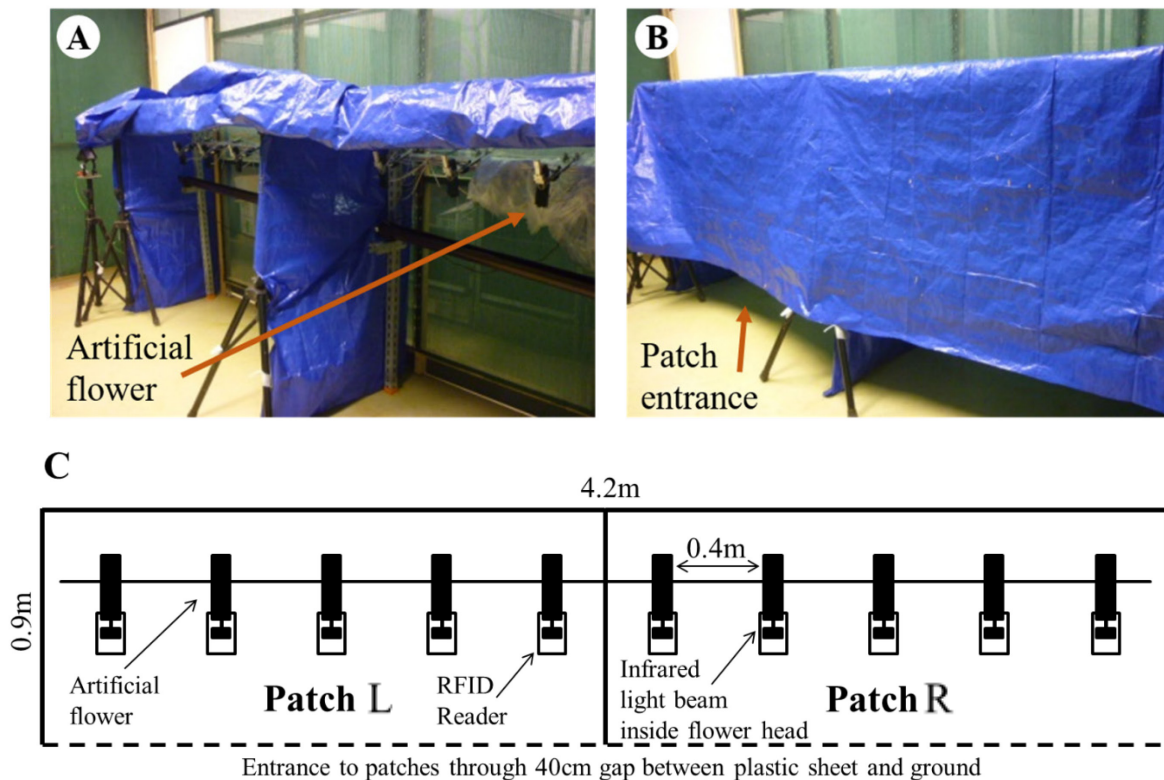

Figure 1: Experimental set-up consisting of two spatially separated patches of five flowers each. (A) The ten flowers were mounted 1.2m above ground. They were divided into two patches, L and R. (B) During experiments the patches were separated by plastic sheets. To make it more demanding for bats to enter a patch, the only entrance was through a 0.4m gap above the ground. (C) Schematic drawing of the experimental set-up from above. The dashed line indicates the side with the patch entrance.

## 119 (c) Experimental procedure

120 Six bats were randomly caught from the colony and were tested simultaneously as a group. Four experimental  
121 groups consisted of three males together with three females (mixed groups), whereas one group consisted of

122 six males, and another of six females. All bats were weighed before the experiment.  
123 During the nightly experiments, in addition to the nectar provided by artificial flowers, bats had access to  
124 pollen and water and to 6mL of additional food containing 1.2g NektarPlus (Nekton, Keltern, Germany)  
125 and 1.8g milk powder (Milasan Folgemilch 2, Sunval Baby Food GmbH, Mannheim, Germany) dissolved in  
126 water. Rewards at flowers consisted always of 30 $\mu$ L nectar (15% w/w sugar concentration, sucrose: fructose  
127 1:2). Before the experimental schedule started, individuals were allowed to familiarize themselves with the  
128 set-up and the artificial flowers. Since during this training phase the plastic cover was removed, the two  
129 flower patches were not spatially separated and every flower visit was rewarded. This phase lasted for one to  
130 four nights until each bat visited the flowers regularly. One female of the first mixed group did not visit any  
131 artificial flower during the first night and was replaced by another female.  
132 During the experiment, the two flower patches were covered and spatially separated (Fig. 1. Experimental  
133 nights were divided into two phases. During the first phase of the night only one of the two flower patches was  
134 rewarding, and therefore the resources were spatially clumped at a single location. The fixed time interval  
135 between rewards at each flower was 60s. During the second phase of the night both patches gave rewards,  
136 resources were evenly distributed across the two patches, and the fixed time interval between two rewards at  
137 a flower was increased to 120s. Therefore, the amount of food available per unit time did not change during  
138 the whole night; only the spatial distribution of food changed from the clumped resource condition with one  
139 patch rewarding (five flowers) during the first phase of the night to the distributed resource condition with  
140 two patches rewarding (ten flowers) during the second phase of the night. With this experimental schedule,  
141 the maximal amount of nectar the bats could collect was 108mL, which corresponds to 18mL nectar per  
142 individual per night, roughly 150% of their daily requirement (Winter and Helversen 2001). The side of  
143 the rewarding patch during the first phase of the night was chosen pseudo-randomly and the same patch  
144 was never chosen in more than two consecutive nights. For the mixed groups, the duration of the clumped  
145 resource condition was six hours and the experiment lasted nine nights (seven nights for the first mixed  
146 group). For the same-sex groups, the duration of the first part of the night was variable (range = 4-8h, mean  
147 = 6h) and the experiment lasted eight nights for the male group and seven nights for the female group.

#### 148 (d) Chasing behavior

149 We took the frequency of individuals chasing each other at the artificial flowers as an indicator of the  
150 intensity of aggressive interactions between group members. We developed a method to automatically detect  
151 and score chasing events using the computer-collected animal identification data from the RFID sensors  
152 and flower sensors. In a previous pilot study (Wintergerst 2018), three mixed groups of bats were video  
153 recorded for 24h over 14 nights, and the video data were synchronized to the computer-collected data.  
154 During this pilot study flowers were not covered by plastic sheets so that all flowers and the surrounding  
155 room were visible on video. From the analysis of the combined data we were able to identify the following  
156 pattern of visitation events that reliably indicated a chasing event between two identified individuals:  
157 (i) an identified bat visited a flower and (ii) its visit was instantaneously followed by the detection of a  
158 second bat, the chaser, that was detected very briefly (<200ms) and only by the ID sensor (detection  
159 range 5-7cm). Importantly, this second bat never attempted to drink and therefore did not insert its nose  
160 into the artificial flower and interrupt the light barrier inside the flower head. This distinguished such  
161 a chase from the occasional quick succession of two feeding visits by two bats at the same flower. This  
162 automated detection of chasing events not saves considerable time for the experimenter, but also avoids the  
163 human observer bias, a common drawback in video analysis. For the 24 hours of combined video data and  
164 automatically logged data, all 89 chasing events detected in the computer-logged data were confirmed by  
165 video. Therefore, we consider the algorithm for detecting chasing events in the logged data to be highly  
166 reliable. Of course, chases did not only occur at the artificial flowers. Thus, our chase numbers are only  
167 an indicator of chasing intensity between pairs of bats. For example, in one hour of video we observed 61  
168 chasing events, but only five of those occurred during flower visits and were also automatically detected.  
169 However, since with our algorithm (see below) we detected a total of 1811 chasing events ( $35.5 \pm 12.3$   
170 events per night during the experiment and only  $4.8 \pm 3$  during the training nights, mean  $\pm$  SD) for  
171 the 36 participating bats, we considered the automated approach adequate for quantifying within-group  
172 dominance relationships. The total number of individual detections per night constrains the number of  
173 chasing opportunities detectable with our method. Therefore, we corrected our counts of chasing events by

174 dividing the number of observed chases for each bat by the total number of detections for that bat on each night.  
175

### 176 (e) Statistical analysis

177 To investigate the difference in chasing behavior between males and females and between the resource  
178 conditions (one versus two rewarding patches) a Bayesian generalized linear mixed model (MCMCg1mm, Hadfield  
179 2010) with a binomial error structure was used. Body weight as an approximation of size and the full  
180 interaction between resource condition and sex were included as fixed effects and the influence of these fixed  
181 effects on the proportion of chasing events was assessed. Experimental group and individual were included  
182 as random effects. The same model structure was used to address the question if the proportion of being  
183 chased was influenced by these independent variables. If one or more individuals start to defend flowers and  
184 thus exclude others from drinking, nectar consumption should increasingly differ between individuals since  
185 the successful chaser should gain a higher nectar intake thus reducing the intake of the chased individuals.  
186 Therefore, the between-individual difference in nectar consumption over the course of the experiment was  
187 compared between experimental groups and resource conditions (clumped vs. distributed). First, each  
188 individual's total nectar consumption standardized by the number of hours of foraging during the clumped  
189 (one rewarding patch) and distributed (two rewarding patches) resource condition was determined for each  
190 experimental night. Then these data were used to calculate group standard deviations, separately for the  
191 males and females of each group. In order to assess the influence of resource defense on the individual  
192 differences in nectar consumption (standard deviation of nectar intake) we fit a MCMCg1mm model with a  
193 Gaussian error structure and the following fixed effects: sex, experimental night (centered), and resource  
194 condition (clumped or distributed), as well as all two-way interactions. Again, we included group and  
195 individual as random effects.

196 By plotting individual nectar consumption during the last two nights of the experiment against the frequency  
197 of chasing other individuals, two non-overlapping groups of males were obtained, which were labeled dominant  
198 and subordinate males, respectively. Such a clear pattern was not observed in females. The identification  
199 of dominant individuals was also supported by calculating the individual Glicko ratings (Glickman 1999;  
200 So et al. 2015) from all chasing events over the last two experimental nights in each group. In the Glicko  
201 Rating algorithm individuals gain or lose ranking points based on their wins or losses and the rating of their  
202 opponent (Glickman 1999; So et al. 2015). Glicko ratings were analyzed using the `PlayerRatings` package  
203 in R (Stephenson and Sonas 2020). Based on nectar consumption, the frequency of chasing events and the  
204 individual Glicko group ranks (from 1 to 6, with 1 corresponding to the highest Glicko rating), each group  
205 contained individuals belonging to one of three different types of social status: female, dominant male, and  
206 subordinate male. To address the question whether nectar consumption varied depending on social status  
207 during the early and late stages of the experiment we used Welch's tests and adjusted the p values using the  
208 Holms method for multiple comparisons.

209 All statistical analyses were conducted using R (Team 2021).

## 210 3. Results

### 211 (a) Example of nectar intake in one experimental group

212 The goal of our experiment was to investigate the sex-specific effects of resource defense in *Glossophaga*  
213 *soricina*, in addition to the potential influence of interference competition on individual nectar intake. The  
214 first striking observation we made was the uneven distribution of nectar consumed between the sexes and  
215 individuals. For example, in the first mixed group of bats tested, after only two nights the nectar consumption  
216 of two males was nearly reduced to zero, whereas the third male increased its consumption substantially (Fig.  
217 2A). This pattern, however, only occurred during the clumped resource condition. Nectar consumption of  
218 females did not change even during the clumped condition. On the same nights but during the second half of  
219 the night, with resources distributed over two patches, nectar consumption of males and females converged at  
220 the end of the experiment (Fig. 2B).

221 **(b) Differences between sexes in frequency of chasing and being chased**

222 In all mixed groups males chased other bats in front of flowers significantly more often than females did  
223 (Fig. 3A, Table 1). Notably, the frequency of females as active chasers in female-only groups was higher than  
224 chasing by females in the mixed groups (Fig. 3A). Although the rate of nectar availability remained constant  
225 throughout the night and only the spatial distribution of the resources changed, the number of chasing events  
226 was significantly lower during the distributed resource condition when rewards were available at both patches  
227 (Table 1). There was no significant difference between the sexes in how often a bat was chased by another  
228 individual (Fig. 3B) but individuals were chased less during the distributed resource condition (Table 1).  
229 Weight as an indicator of size had no significant effect on chasing frequency or the frequency of being chased  
230 (Table 1).

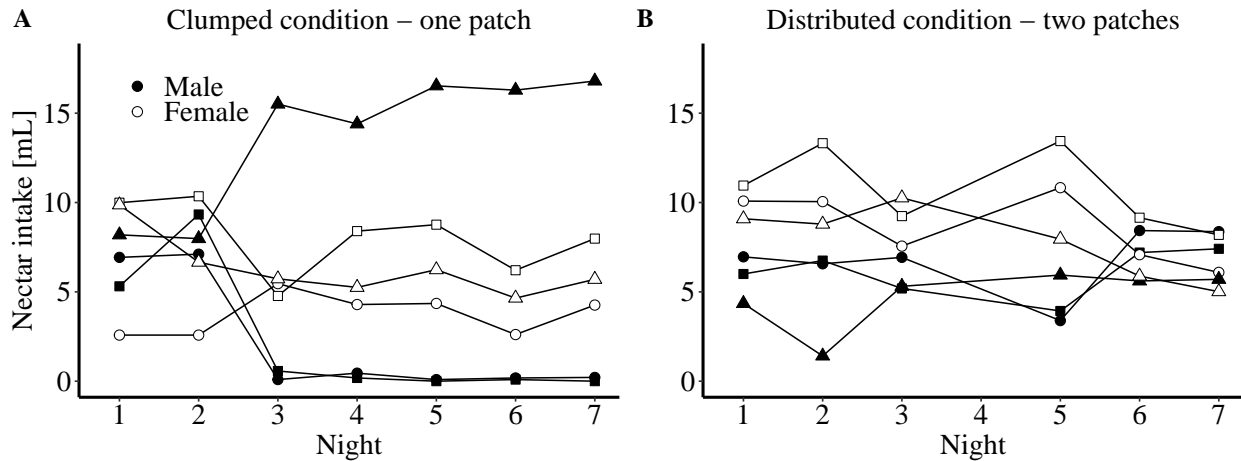

Figure 2: Change of individual nectar consumption from the clumped condition (A) to the distributed condition (B) during an experiment of one mixed group (3M, 3F, symbols show different individuals). (A). During the clumped resource condition (first part of the experimental night) rewards were only available at one patch. The nectar consumption of two subordinate males approached zero after only two nights, whereas the third, dominant, male greatly increased nectar intake during the experiment (males filled symbols). Females (open symbols) on the other hand maintained a stable level of nectar intake. (B) During the distributed resource condition (second part of the experimental night) rewards were available at both patches. Under this condition, individuals nearly equalized their level of nectar intake over the course of the experiment. The second part of night 4 was excluded due to technical problems.

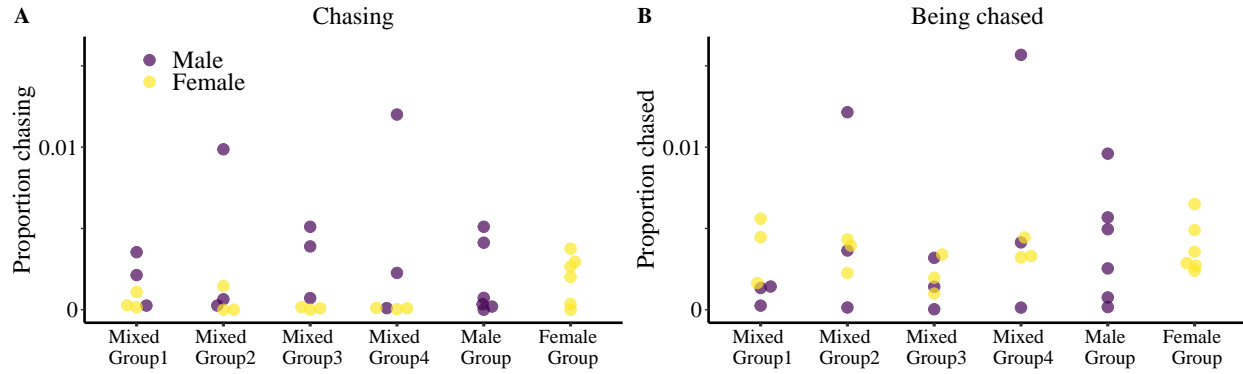

Figure 3: Sexes differed in the frequency of chasing or being chased during the clumped resource condition. **(A)** Males (dark symbols) chased others significantly more than females did (light symbols, Table 1). Shown are the individual proportions of chasing events over the whole experiment. Notably, in the females-only group some females chased more than any female in the mixed groups. **(B)** Being chased by other bats did not differ significantly between sexes (Table 1), but the variance of being chased was much higher for males.

Table 1: Summary of fixed effects from generalized linear mixed-effects models of chasing frequency and the frequency of being chased.

| Model               | term                                 | estimate     | 95% credible interval | pMCMC        |
|---------------------|--------------------------------------|--------------|-----------------------|--------------|
| <b>Chasing</b>      |                                      |              |                       |              |
|                     | (Intercept)                          | -6.52        | (-18.06, 5.46)        | 0.252        |
|                     | sex (female)                         | <b>-2.09</b> | <b>(-3.47, -0.65)</b> | <b>0.001</b> |
|                     | condition (distributed)              | <b>-0.49</b> | <b>(-0.76, -0.23)</b> | <b>0.001</b> |
|                     | weight                               | -0.01        | (-1.34, 1.1)          | 0.962        |
|                     | sex (female):condition (distributed) | -0.29        | (-0.75, 0.19)         | 0.228        |
| <b>Being chased</b> |                                      |              |                       |              |
|                     | (Intercept)                          | -2.93        | (-11.98, 4.61)        | 0.496        |
|                     | sex (female)                         | 0.90         | (-0.12, 1.86)         | 0.078        |
|                     | condition (distributed)              | <b>-0.98</b> | <b>(-1.24, -0.74)</b> | <b>0.001</b> |
|                     | weight                               | -0.40        | (-1.26, 0.44)         | 0.326        |
|                     | sex (female):condition (distributed) | -0.13        | (-0.48, 0.24)         | 0.440        |

Note: Fixed estimates whose credible intervals do not span zero are shown in bold. pMCMC = posterior probability

### 231 (c) Differences in nectar intake over time and between sexes and conditions

232 Resource defense should lead to a larger between-individual difference in nectar consumption (Brown 1964).

233 Differences in nectar consumption were quantified as the standard deviation of nectar intake in each group,



234 separately for males and females. During the clumped resource condition, the standard deviation increased  
235 significantly over time for males (Table 2, Fig. S1) and was generally higher for males than for females (Table  
236 2, Fig. S1). For females in the clumped resource condition the increase in standard deviation was significantly  
237 smaller than in males (significant interaction between sex and night, Table 2), and was not itself significant  
238 (estimate = 0.03, 95% CI = -0.02, 0.07). Compared to the clumped resource condition, in the distributed  
239 resource condition the effect of experimental night was significantly lower for males (interaction between  
240 condition and night, Table 2), but not for females (estimate = 0, 95% CI = -0.03, 0.02). Moreover, in the  
241 distributed resource condition there was no significant change over the course of the experiment in males  
242 (estimate = 0.01, 95% CI = -0.03, 0.05) nor in females (estimate = 0.03, 95% CI = -0.02, 0.06). Overall,  
243 for both males (significant effect of condition) and females (estimate = -0.07, 95% CI = -0.14, -0.02) the  
244 standard deviations were higher in the clumped than in the distributed resource conditions.

Table 2: Summary of fixed effects from a generalized linear mixed-effects model of the standard deviation of nectar intake over time.

| term                                       | estimate 95% credible interval | pMCMC        |
|--------------------------------------------|--------------------------------|--------------|
| (Intercept)                                | <b>0.52 (0.37, 0.68)</b>       | <b>0.001</b> |
| sex (female)                               | <b>-0.20 (-0.26, -0.14)</b>    | <b>0.001</b> |
| condition (distributed)                    | <b>-0.23 (-0.29, -0.17)</b>    | <b>0.001</b> |
| night                                      | <b>0.06 (0.01, 0.1)</b>        | <b>0.022</b> |
| sex (female):condition (distributed)       | <b>0.15 (0.06, 0.23)</b>       | <b>0.001</b> |
| sex (female):night                         | <b>-0.03 (-0.06, -0.01)</b>    | <b>0.015</b> |
| condition (distributed):night              | <b>-0.04 (-0.07, -0.02)</b>    | <b>0.001</b> |
| sex (female):condition (distributed):night | <b>0.04 (0.01, 0.08)</b>       | <b>0.020</b> |

Note: Fixed estimates whose credible intervals do not span zero are shown in bold. pMCMC = posterior probability

#### 245 (d) Social status and its effects on nectar intake

246 When plotting chasing events against nectar consumption the data for males fall into two non-overlapping  
 247 groups. The males of one cluster (Fig. 4A, inside dashed oval) chased other individuals and consumed more  
 248 nectar than the other males. This cluster included only one male from each of the four mixed groups but  
 249 two males from the single males-only group. These six males were categorized as “dominant.” The second  
 250 cluster of males (Fig. 4A, outside and below dashed oval) was characterized by a low frequency of chasing  
 251 and low nectar consumption. These males were categorized as “subordinate.” In females such a pattern did  
 252 not emerge (Fig. 4B). This classification was also supported by the Glicko ratings in each group (Fig. S2)  
 253 and the observation that there was generally an inverse relationship between the frequency of chasing and the  
 254 frequency of being chased, especially in males (Fig. S3). While in the females-only group four females chased  
 255 other females more frequently, only one of these females would be classified as dominant using the same  
 256 cut-off criteria we used for the males (Fig. 4B), but this was not the female with the highest Glicko rating  
 257 (Fig. S2). During the last two nights of the experiment in the clumped resource condition, the highest nectar  
 258 intake was observed in dominant males, with an intermediate intake in females, and lowest nectar intake  
 259 in subordinate males (Fig. 5). In contrast, in the distributed resource condition there were no detectable  
 260 differences between the nectar intake of dominant and subordinate males at any stage of the experiment (Fig.  
 261 5), while the subordinate males had a significantly lower nectar intake than females in the first two, but not  
 262 in the last two experimental nights (Fig. 5). Finally, the subordinate males increased their nectar intake from  
 263 the clumped to the distributed condition, but the difference was only significant for the last two experimental  
 264 nights (Fig. 5). While there was a correspondent decrease in the nectar intake of dominant males, it was not  
 265 significant, most likely due to the small sample size ( $n = 6$ , Fig. 5). Again, in females there was no change in  
 266 nectar intake between the resource conditions (Fig. 5)

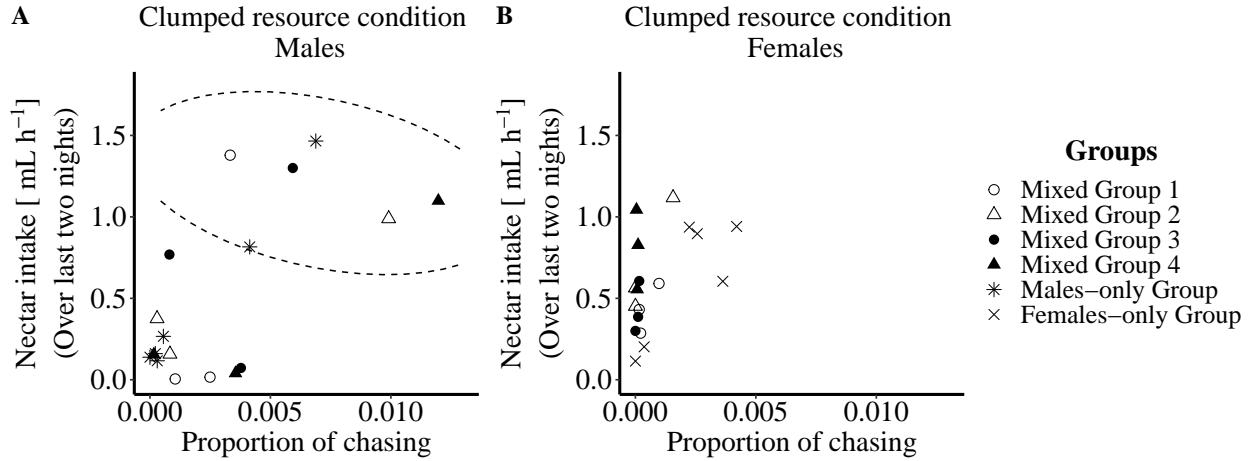

Figure 4: Influence of chasing frequency on nectar intake in the clumped resource condition during the last two nights of the experiment. **(A)** Males that more often chased other males also consumed more nectar. Males were divided into two non-overlapping groups by considering the chasing frequency and the amount of nectar an individual received during the clumped resource condition at the end of the experiment. Dominant males (inside dashed line oval) met two criteria: they chased other individuals at flowers more frequently ( $>0.003$ ) and received more nectar ( $>0.75\text{mL h}^{-1}$ ) during the clumped resource condition. Individuals outside the dashed line oval were categorized as subordinate males. **(B)** Nectar consumption of females did not generally depend on chasing frequency during the clumped resource condition and non-overlapping groups did not emerge.

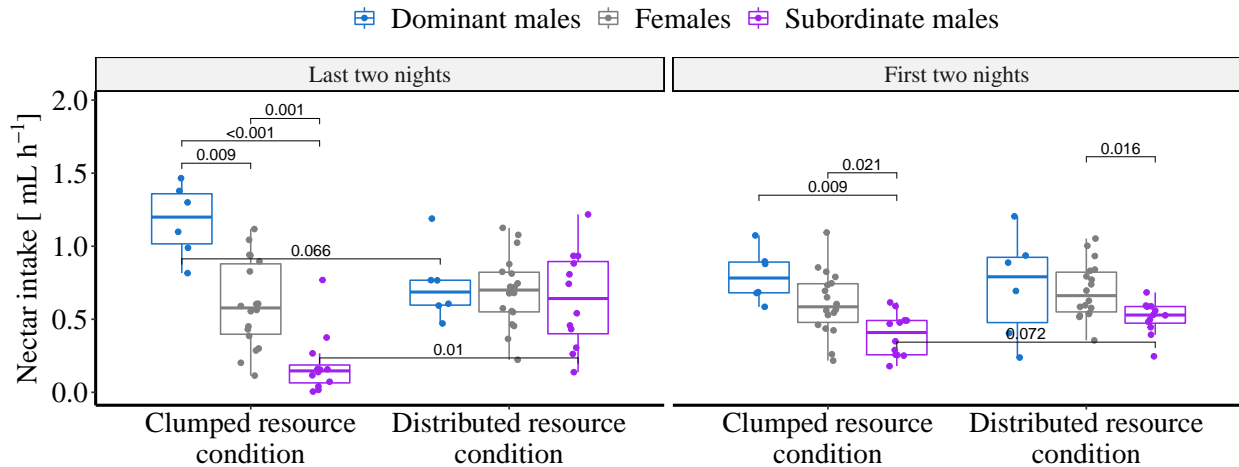

Figure 5: Comparison of nectar intake during the first and last two nights of the experiment depending on sex and social status. During the clumped resource distribution (left in each panel), already at the beginning of the experiment (right panel) subordinate males collected significantly less nectar than dominant males and females. At the end of the experiment (left panel), females, dominant and subordinate males differed to a large extent in their nectar consumption. During the distributed resource condition at the beginning of the experiment subordinate males received less nectar than females, but these differences disappeared by the end of the experiment. Numbers above brackets are the p values from unequal variance T tests (Welch's tests), adjusted for multiple comparisons using the Holms method. Contrasts between conditions were from paired Welch's tests. For clarity, only p values smaller than 0.1 are shown.

## 267 (e) Behavioral observations

268 Qualitative behavioral observations of four hours of video recordings revealed several behaviors that seem to  
 269 be characteristic for dominant males. Instead of just visiting the flowers and leaving the patch as the other  
 270 individuals did, dominant males remained hanging between the flowers within the patch for a significant  
 271 amount of time (Fig. S4). When other individuals came close due to visits of directly adjacent flowers,  
 272 dominant males often spread one wing in the direction of the other individual which could be interpreted as  
 273 a threatening posture. Some individuals were attacked and chased away by dominant males while visiting  
 274 artificial flowers. In this case, dominant males mostly attacked from above with their mouth wide open, and  
 275 followed the intruder for a short distance. Sometimes the chasing escalated into fighting with both bats  
 276 tumbling towards the ground and resuming their flight only shortly above the floor. In rare cases, these fights  
 277 might have led to small injuries. One subordinate male had several fresh scratches on its wing that were not  
 278 present before the experiment and that were possibly caused by bites (Fig. S5). After a successful flower  
 279 defense, the dominant male normally visited most of the five flowers within the patch before returning to its  
 280 hanging position between the flowers.

## 281 4. Discussion

282 Similar to observations in free-living *Glossophaga* populations, in this experiment *G. mutica* competed for  
 283 nectar not only by exploitation but also by interference competition. However, the results show that the  
 284 predisposition to defend resources and the influence of interference competition on individual nectar intake  
 285 differed significantly between the sexes. Only a subset of individuals, exclusively males in the mixed-sex groups,  
 286 successfully defended flower patches. Dominant individuals were characterized by the highest frequency of  
 287 chasing other individuals away from profitable flowers, by the highest Glicko ratings, and by a substantial  
 288 increase in nectar intake during the time periods of active defense by the end of the experimental run.

289 Although the dominant males in the mixed groups chased females and other males equally often, only the  
290 nectar intake of subordinate males but not of the females was affected by this behavior. Thus, male-initiated  
291 interference competition increased the difference in nectar intake between males but did not affect females.  
292 The frequency of aggressive interactions was higher, and males only defended resources successfully when  
293 the available nectar was concentrated at only one flower patch. This supports the hypothesis that clumped  
294 resources favor an increase in aggressive interactions (Grant 1993).

### 295 **(a) Sex-dependent resource defense and its differential effect on nectar intake,** 296 **depending on social status**

297 To our knowledge, this study is the first report of sex-dependent differences in resource defense behavior of  
298 neotropical nectar-feeding bats. In mixed sex groups, females seemed to be much less affected by the behavior  
299 of dominant males whereas subordinate males were excluded at least partially from the defended flower patch.  
300 This finding is consistent with observations of free-flying *G. commissarisi*, in which males visited on average  
301 a smaller number of artificial flowers than females did (Nachev and Winter 2019), presumably because of  
302 interactions with other males. There are two possible explanations for this differential effect on subordinate  
303 males and females. On the one hand, dominant males might just not be capable of excluding females. On  
304 the other hand, dominant males could tolerate females in their defended patch because they might receive  
305 additional benefits, for example tolerating females could lead to an increase in (future) mating opportunities.  
306 Similar social dynamics have been described in the insectivorous bat species *Myotis daubentonii* (Senior,  
307 Butlin, and Altringham 2005). Dominant males of this species temporarily exclude other males from profitable  
308 habitats whereas females are tolerated and in addition to securing access to resources, the successful exclusion  
309 of other males has been shown to increase the reproductive success of dominant males (Senior, Butlin, and  
310 Altringham 2005). Similarly, it has been observed that male purple-throated carib hummingbirds (*Eulampis*  
311 *jugularis*), which successfully defend highly profitable feeding-territories against other males while sharing the  
312 available resources with females, experienced an increase in their mating success (Temeles and Kress 2010).  
313 However, in our experiment dominant males chased females about as often as they chased subordinate males  
314 (Table 1). If females were able to feed in the defended patch because dominant males tolerated them due  
315 to potential additional benefits, it could be that the detected chasing events by dominant males differed in  
316 quality depending on the sex of the intruder. This was not further quantified in the current study but could  
317 potentially be investigated using audio recordings (Knörnschild, Glöckner, and Helversen 2010). We extracted  
318 the frequency of chasing events from data automatically recorded at artificial flowers (successive detection  
319 of two different IDs while and after the first was feeding at the flower). Therefore, it was not possible to  
320 determine if males showed behavioral differences when chasing other males in comparison to chasing females.  
321 The recorded videos revealed that individuals chased each other not only directly at the artificial flowers but  
322 also in other areas of the flower patch. Since individuals could only be identified by their ID tags directly at  
323 the ID reader attached to artificial flowers the sex of individuals chasing each other in other areas of the  
324 experimental room remained unknown. However, after the experiment some subordinate individuals showed  
325 marks from small injuries at their wings (see example in Fig. S5) and such marks were only observed in males.  
326 This could be an indication that dominant males directed more aggression (biting) towards subordinate  
327 males than towards females. Such sexual dimorphism in aggressive resource defense is also known from other  
328 nectar-feeding vertebrates, like hummingbirds. The beaks of the males of some territorial hummingbirds seem  
329 to be specifically adapted as intrasexually selected weapons (Rico-Guevara et al. 2019).

### 330 **(b) Some observations from the single-sex groups**

331 Generally, females showed lower chasing frequencies, but, surprisingly, some females in the females-only group  
332 showed an increased nectar consumption and chasing frequency, compared to the females in the mixed groups  
333 (Fig. 4B). Thus it appears that in the absence of male individuals, some females exerted dominant behavior  
334 over the other females, similar to males. These findings are similar to the social structure of resource defense  
335 found in some nectar-feeding bird species. For example, in free-living ruby-throated hummingbirds females  
336 also have lower levels of defense (Rousseu, Charette, and Bélisle 2014). Moreover, although both male and  
337 female *Eulampis jugularis* hummingbirds defend feeding territories during the non-breeding season, males are  
338 always dominant over females (Wolf and Hainsworth 1971; Temeles, Goldman, and Kudla 2005). It would be

339 interesting to better understand why females were less affected by the aggressive resource defense behavior of  
340 dominant males compared to subordinate males and why females themselves did not consistently monopolize  
341 the profitable patch against other females, not even in the females-only group. Of course, as there was but a  
342 single females-only group, the latter observation needs to be confirmed with more data. One possibility is  
343 that females do not need to defend flowers when a dominant male is already reducing the number of flower  
344 visitors and thus increasing the amount of food available.

345 In all mixed sex groups, only one male per group became dominant and successfully defended flowers, whereas  
346 in the males-only group two males exhibited dominant behavior (Fig. 4A). A closer look at the nectar  
347 consumption at each flower revealed that on the last night of the experiment these two males had nearly  
348 monopolized different flowers within the same patch rather than sharing access to the same flowers (Fig. S6).  
349 Such flower partitioning was also observed in the females-only group (Fig. S7), but rarely seen in the mixed  
350 groups (Figs. S8-S11). The successful resource defense by two individuals in the male-only group showed  
351 that resource defense can occur independent of the presence of females, but, again, this was only based on a  
352 single observation.

### 353 (c) Social status and social hierarchy

354 Although the position of the rewarding patch during the clumped resource condition changed between the  
355 nights between the left and right, usually the same male continued to successfully defend the patch, especially  
356 in the mixed-sex groups (Figs. S6-S11). This means that males defended the resources themselves and not a  
357 particular location. Furthermore, this shows that even after changing the location of the defended patch  
358 the same individuals were usually able to succeed in re-establishing their dominance against other males,  
359 indicating a stable hierarchy at least for the duration of the experiment.

360 The ability of an individual to successfully defend and monopolize resources is often correlated with distinct  
361 physical characteristics for example body size (Searcy 1979). However, in our results weight as an approxima-  
362 tion of size did not correlate significantly with the chasing frequency of individuals (Table 1) and therefore  
363 did not predict which male succeeded to defend a flower patch. Another factor that could influence the  
364 success in defending flowers is age and therefore experience (Arcese 1987; Yasukawa 1979). Since we could  
365 only discriminate between young and adult animals, we cannot dismiss age and experience as a predictor of  
366 successful flower defense.

367 In this study, subordinate males received considerably less nectar than dominant males and females (Fig. 5).  
368 However, except in mixed group 1, subordinate males were rarely completely excluded from the flower patch  
369 and their average nectar intake during the clumped resource condition was still  $0.3 \pm 0.18 \text{ mL h}^{-1}$  (mean  $\pm$   
370 SD). This result is in accordance with observations of free-living *G. soricina* in Colombia. There, subordinate  
371 bats exploited the flowers defended by other individuals as soon as the dominant bat temporarily ceased  
372 defending (Lemke 1984). Furthermore, in our study the frequency of chasing events decreased significantly  
373 during the distributed resource condition in the second part of the night (Table 1). This supports the  
374 theoretical prediction that aggressive defense behavior increases when resources are spatially concentrated  
375 (Grant and Guha 1993), with the important caveat that the sequence of conditions was not controlled in this  
376 experiment. With the current data we cannot answer whether the dominant males would successfully defend  
377 a patch if the condition changed from distributed to clumped, but we believe this is a different question that  
378 should be addressed separately. Resource defense should only occur when the energy gain outweighs the  
379 cost of aggressive interactions (Brown 1964). Thus, our results could be explained by the decrease in quality  
380 of the defended patch once its nectar supply rate dropped to half. This is also supported by the very low  
381 number of chases observed during training when the flowers gave unrestricted rewards and were not separated  
382 in discrete patches. Together, these results suggest that along the different degrees of territorial behavior,  
383 resource defense observed in *Glossophaga* seems to represent a transient monopolization of resources instead  
384 of a longer-term permanent exclusion of intruders.

### 385 (d) Conclusion

386 Although flower defense behavior of *G. mutica* was investigated in a laboratory setting, we observed similar  
387 behavior as described in free-living *Glossophaga* populations. Our results revealed a sexual dimorphism in  
388 flower defense behavior in mixed-sex groups. Only males successfully defended flower patches and excluded

389 other males from their defended resource, whereas females remained unaffected by this male behavior and  
390 continued to visit the flowers guarded by a male. This observed pattern is similar to resource defense behavior  
391 observed in other nectar-feeding vertebrates. Furthermore, we could show that the frequency of aggressive  
392 interactions was, as predicted, higher when resources were clumped in one patch and transient. Future studies  
393 with free-living populations have to be conducted to assess how frequent and important resource defense in  
394 these nectar-feeding bats is and if males that are successful in defending resources have additional fitness  
395 advantages.

## 396 Supplementary material

### 397 Video analysis

398 There were 89 chase occurrences observed (f->f 4 times, f->m 2 times, m->f 59 times, m->m 24 times).  
399 Every time the algorithm marked an event as a chase event, there were two individuals following each other.  
400 Some chase sequences did not get detected. The individual that chased never drank immediately after the  
401 chase at the same flower location where the chase occurred. There were 16 incidences that were difficult to  
402 classify by observation or did not appear to be aggressive interactions.

403

404 f->f appear to be less aggressive

405 f->m appear aggressive

406 m->f appear aggressive

407 m->m appear aggressive

408

### 409 Supplementary figures

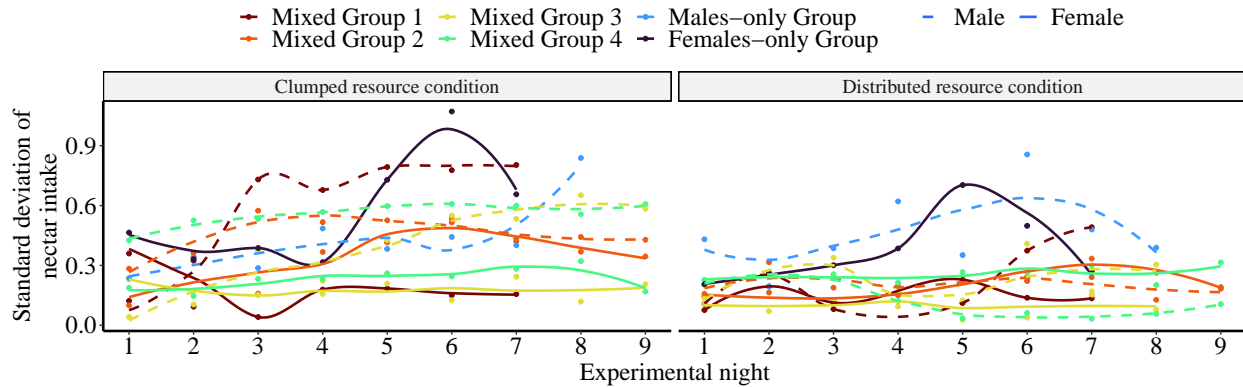

Figure S1: The standard deviation of group nectar consumption was used to measure the between individual differences in nectar intake. It was calculated for the clumped (left panel) and the distributed (right panel) resource conditions, separately for males (dashed lines) and females (continuous lines) from each experimental group (different colors). For visualization only, lines give the corresponding fits based on locally weighted scatterplot smoothing (loess). The statistical analysis was based on linear regression (see Methods).



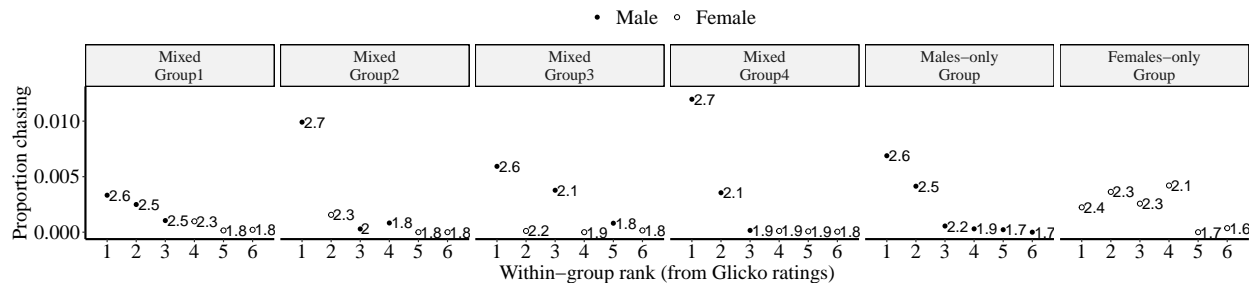

Figure S2: Glicko ratings within the six experimental groups. Over the last two experimental nights, the males (closed symbols) with the highest proportion of chasing events were also the individuals with the highest Glicko rating in each group (panels) during the clumped resource condition. There was no such correspondence for females in the female-only group (right panel). Numbers at symbols give the Glicko rating in thousands.

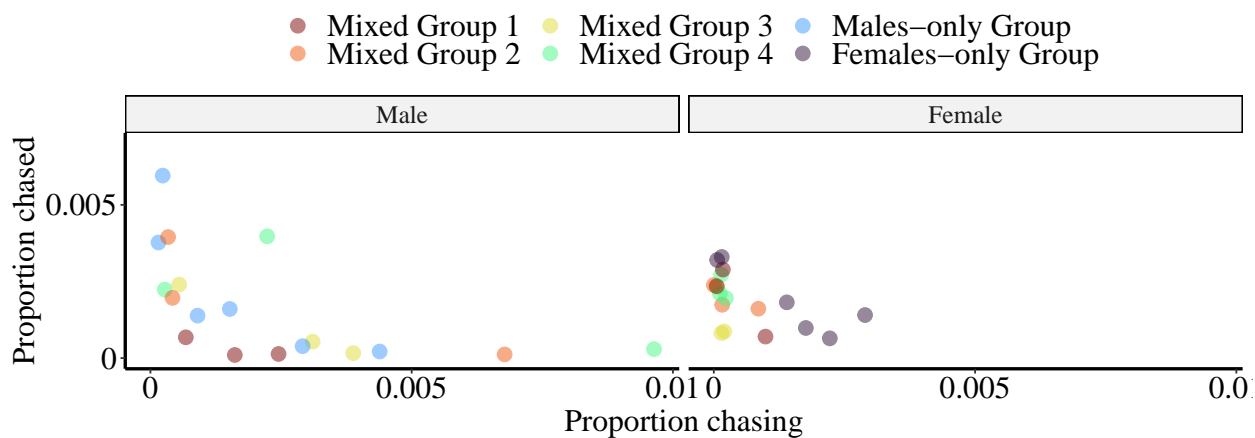

Figure S3: The relationship between proportion of chases versus the proportion of being chased out of all detections for female (right) and male (left) individuals in the six experimental groups (different colors).

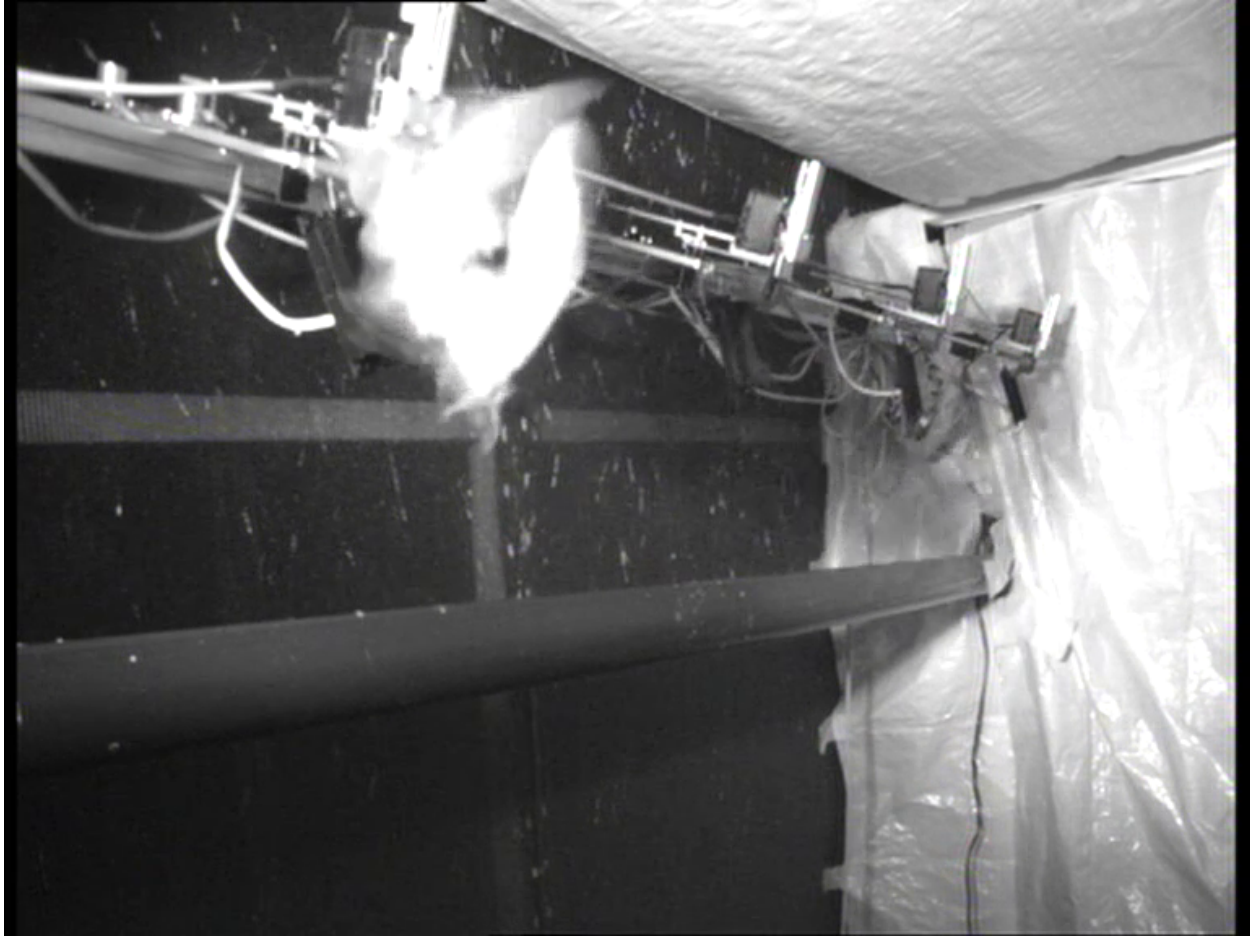

Figure S4: Video of the dominant male in mixed group 3 chasing all bats approaching the rewarding flowers in the rewarding patch during the clumped resource condition.

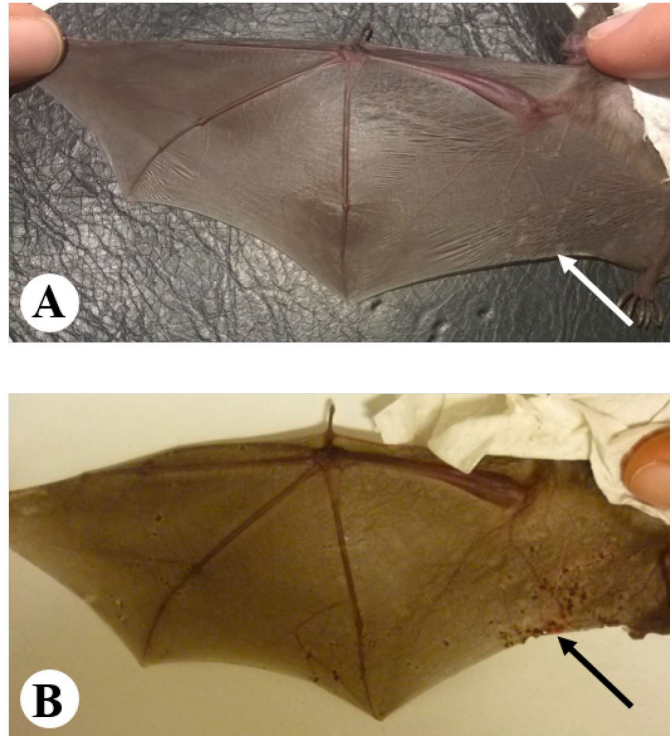

Figure S5: Wing images of a subordinate male from mixed group 4. The same individual was photographed before (**A**) and after the experiment (**B**). The black arrow points to the scarred location due to wing injuries, purportedly caused by the dominant male.

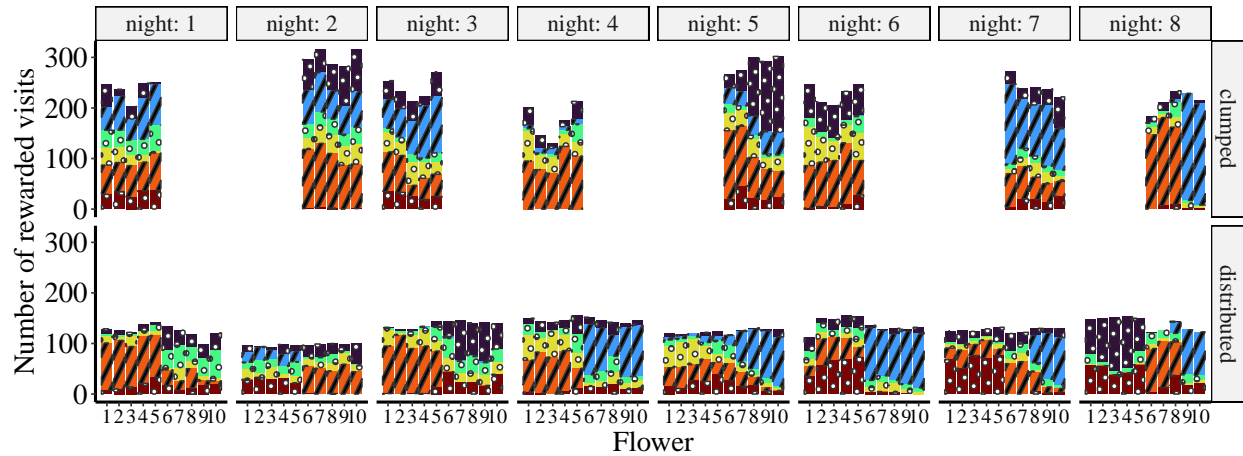

Figure S6: Distribution of rewarded visits across flowers for the six bats in the males-only group. The colored bars give the number of rewarded visits of each individual at the ten flowers during the clumped (top) and distributed (bottom) resource conditions for each experimental night (columns). The dominant males are shown with black stripes and the subordinate males are shown with white dots. This was the only group with two males behaving as dominant. On the last night, rather than sharing all flowers within the defended patch, the dominant males partitioned the patch into two subpatches, with each bat defending its own partition.

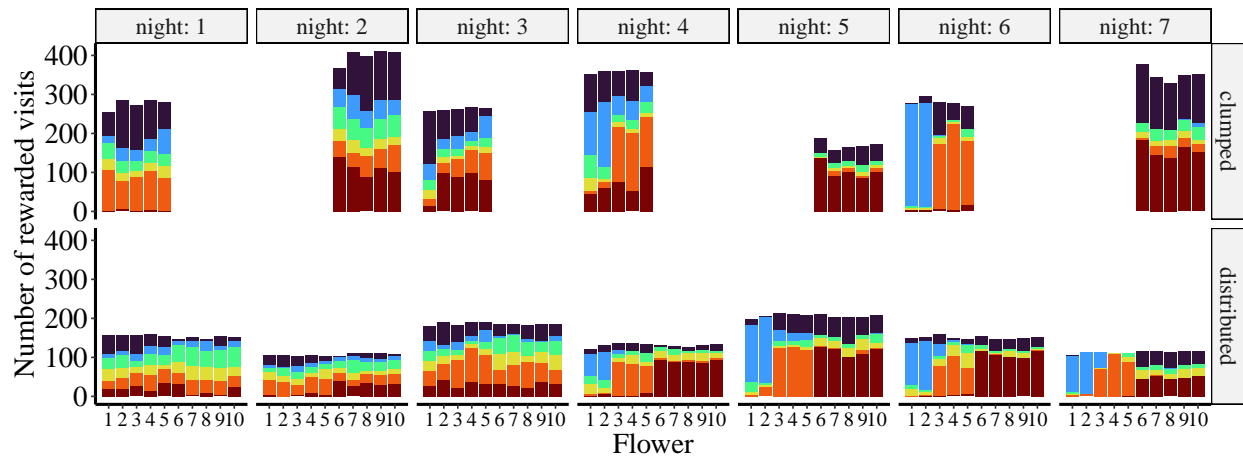

Figure S7: Distribution of rewarded visits across flowers for the six bats in the females-only group. The colored bars give the number of rewarded visits of each individual at the ten flowers during the clumped (top) and distributed (bottom) resource conditions for each experimental night (columns). Females in this group exhibited the highest frequency of chasing behavior compared to all other females. This is also the only group, in which females nearly monopolized flower patches or flowers within a patch.

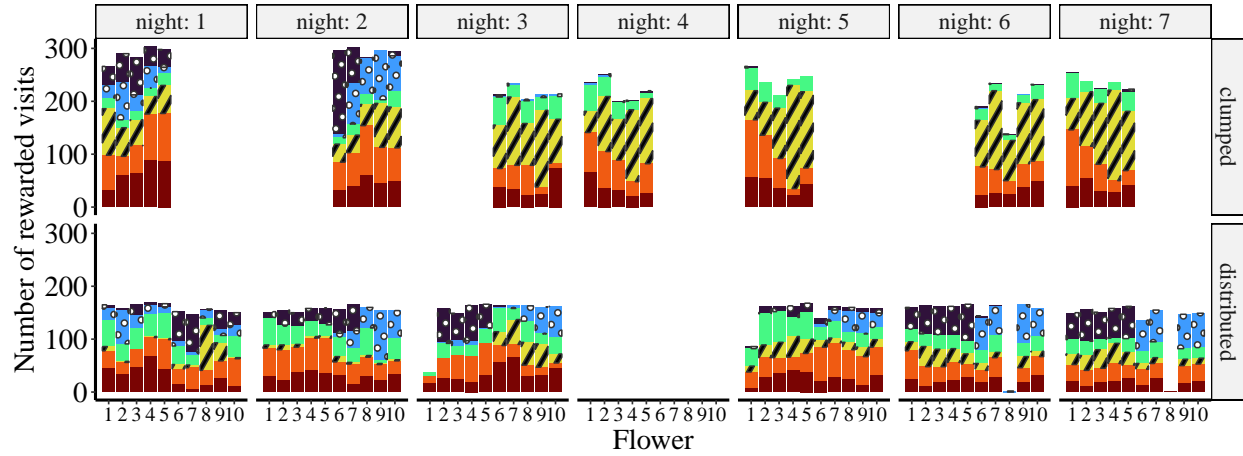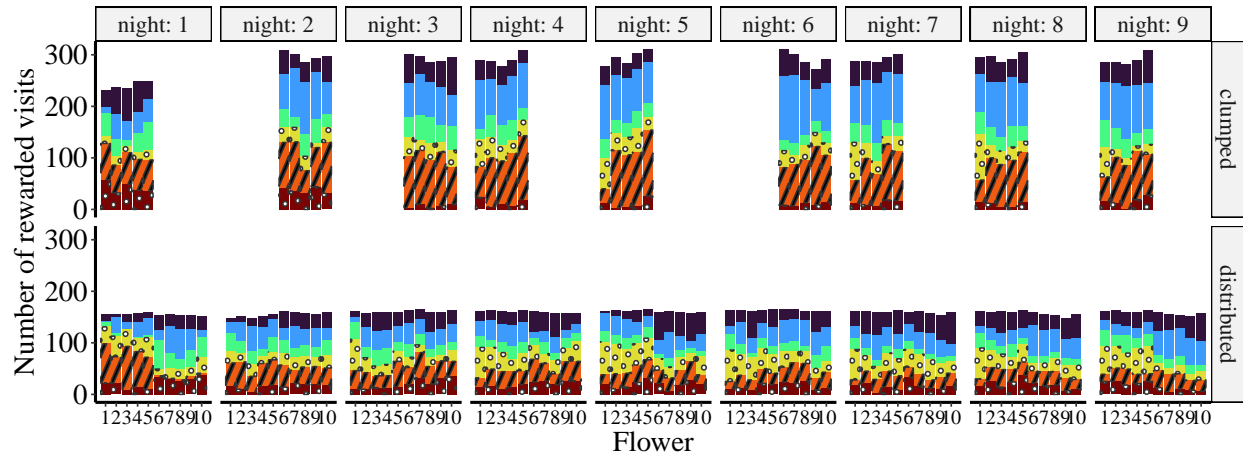

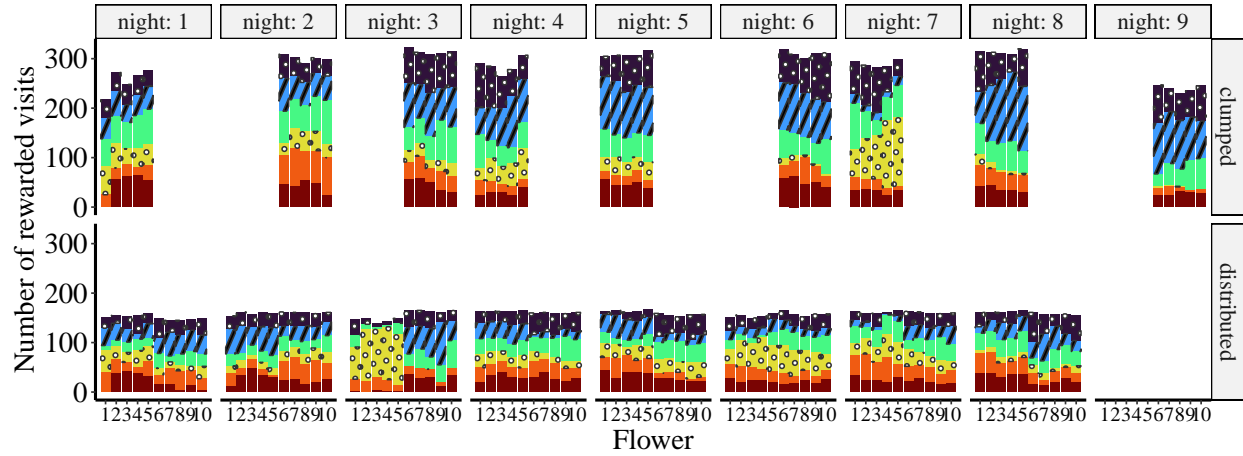

Figure S10: Distribution of rewarded visits across flowers for the six bats in mixed group 3. Same notation as in Fig. S8, but the colors correspond to different individuals. Due to a technical malfunction on night 9, there were no rewards delivered in the distributed resource condition and the data were excluded from analysis.

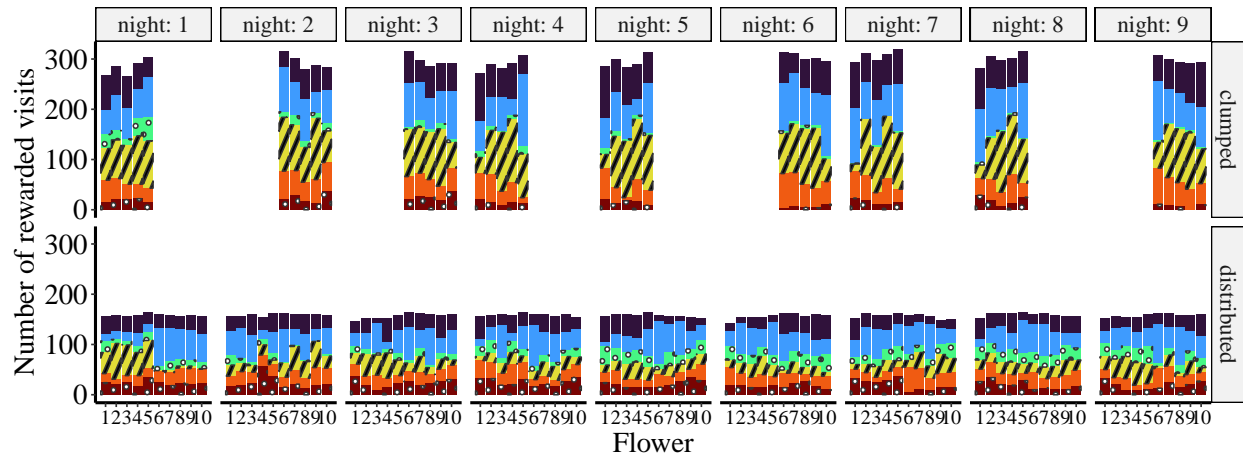

Figure S11: Distribution of rewarded visits across flowers for the six bats in mixed group 4. Same notation as in Fig. S8, but the colors correspond to different individuals.

## 410 **Authors' contributions**

411 S.W. Conceptualization, Methodology, Software, Data collection, Formal Analysis, Video Analysis, Writing—  
412 original draft. V.N. Conceptualization, Methodology, Software, Formal Analysis, Data curation, Writing—  
413 review and editing, Visualization, Supervision, Project Administration.

414 Y.W. Conceptualization, Resources, Methodology, Software (data acquisition), Writing—review and editing,  
415 Supervision, Funding.

## 416 **Competing interests**

417 We declare we have no competing interests.

## 418 **Funding**

419 S.W. was supported by an Elsa-Neumann-Stipendium des Landes Berlin.

## 420 **Acknowledgements**

421 We thank Katja Frei and Peggy Hoffmann for assistance with the main experiments and animal keeping,  
422 Alexej Schatz for programming of the control software, and Peter Spende, Francesco Bagorda, and Waldemar  
423 Krzok for help with the experimental hardware. We also thank Marion Rivalan and Lucille Alonso for a  
424 fruitful discussion on the analysis of social behavior.

## 425 **Data Availability**

426 All data and code are available in the Zenodo repository: <https://doi.org/10.5281/zenodo.5205511>.

## References

- 427  
428 Amarasekare, Priyanga. 2002. “Interference Competition and Species Coexistence.” *Proceedings of the Royal*  
429 *Society of London. Series B: Biological Sciences* 269 (1509): 2541–50. [https://doi.org/10.1098/rspb.2002.](https://doi.org/10.1098/rspb.2002.2181)  
430 2181.
- 431 Arcese, Peter. 1987. “Age, Intrusion Pressure and Defence Against Floaters by Territorial Male Song  
432 Sparrows.” *Animal Behaviour* 35 (3): 773–84. [https://doi.org/10.1016/S0003-3472\(87\)80114-8](https://doi.org/10.1016/S0003-3472(87)80114-8).
- 433 Boyden, Thomas C. 1978. “Territorial Defense Against Hummingbirds and Insects by Tropical Hummingbirds.”  
434 *The Condor* 80 (2): 216–21. <https://doi.org/10.2307/1367921>.
- 435 Brown, Jerram L. 1964. “The Evolution of Diversity in Avian Territorial Systems.” *The Wilson Bulletin* 76  
436 (2): 160–69. <https://www.jstor.org/stable/4159278>.
- 437 Brunet-Rossini, Anja K., and Gerald S. Wilkinson. 2009. “Methods for Age Estimation and the Study  
438 of Senescence in Bats.” In *Ecological and Behavioral Methods for the Study of Bats.*, 2nd. ed, 315–25.  
439 Baltimore, MD: Johns Hopkins University Press.
- 440 Calahorra-Oliart, Adriana, Sandra M Ospina-Garcés, and Livia León-Paniagua. 2021. “Cryptic Species in  
441 *Glossophaga Soricina* (Chiroptera: Phyllostomidae): Do Morphological Data Support Molecular Evidence?”  
442 *Journal of Mammalogy* 102 (1): 54–68. <https://doi.org/10.1093/jmammal/gyaa116>.
- 443 Carpenter, F. L., and R. E. Macmillen. 1976. “Threshold Model of Feeding Territoriality and Test with a  
444 Hawaiian Honeycreeper.” *Science (New York, N.Y.)* 194 (4265): 639–42. [https://doi.org/10.1126/science.](https://doi.org/10.1126/science.194.4265.639)  
445 194.4265.639.
- 446 Chase, Ivan D., Craig Tovey, Debra Spangler-Martin, and Michael Manfredonia. 2002. “Individual Differences  
447 Versus Social Dynamics in the Formation of Animal Dominance Hierarchies.” *Proceedings of the National*  
448 *Academy of Sciences* 99 (8): 5744–49. <https://doi.org/10.1073/pnas.082104199>.
- 449 Ewald, Paul W., and F. Lynn Carpenter. 1978. “Territorial Responses to Energy Manipulations in the Anna  
450 Hummingbird.” *Oecologia* 31 (3): 277–92. <https://doi.org/10.1007/BF00346248>.
- 451 Gill, Frank B., and Larry L. Wolf. 1975. “Economics of Feeding Territoriality in the Golden-Winged Sunbird.”  
452 *Ecology* 56 (2): 333–45. <https://doi.org/https://doi.org/10.2307/1934964>.
- 453 Glickman, Mark E. 1999. “Parameter Estimation in Large Dynamic Paired Comparison Experiments.”  
454 *Journal of the Royal Statistical Society: Series C (Applied Statistics)* 48 (3): 377–94. <https://doi.org/https://doi.org/10.1111/1467-9876.00159>.
- 456 Gonzalez-Terrazas, Tania P., Carlos Martel, Paulo Milet-Pinheiro, Manfred Ayasse, Elisabeth K. V. Kalko,  
457 and Marco Tschapka. 2016. “Finding Flowers in the Dark: Nectar-Feeding Bats Integrate Olfaction  
458 and Echolocation While Foraging for Nectar.” *Royal Society Open Science* 3 (8): 160199. <https://doi.org/10.1098/rsos.160199>.
- 460 Grant, James W. A. 1993. “Whether or Not to Defend? The Influence of Resource Distribution.” *Marine*  
461 *Behaviour and Physiology* 23 (1-4): 137–53. <https://doi.org/10.1080/10236249309378862>.
- 462 Grant, James W. A., Isabelle L. Girard, Cindy Breau, and Laura K. Weir. 2002. “Influence of Food  
463 Abundance on Competitive Aggression in Juvenile Convict Cichlids.” *Animal Behaviour* 63 (2): 323–30.  
464 <https://doi.org/10.1006/anbe.2001.1891>.
- 465 Grant, James W. A., and Rabi T. Guha. 1993. “Spatial Clumping of Food Increases Its Monopolization  
466 and Defense by Convict Cichlids, *Cichlasoma Nigrofasciatum*.” *Behavioral Ecology* 4 (4): 293–96.  
467 <https://doi.org/10.1093/beheco/4.4.293>.
- 468 Hadfield, Jarrod D. 2010. “MCMC Methods for Multi-Response Generalized Linear Mixed Models: The  
469 MCMCglmm R Package.” *Journal of Statistical Software* 33 (2): 1–25.
- 470 Howell, D. J. 1974. “Acoustic Behavior and Feeding in Glossophagine Bats.” *Journal of Mammalogy* 55 (2):  
471 293–308. <https://doi.org/10.2307/1378999>.



- 472 Hörmann, David, Marco Tschapka, Andreas Rose, and Mirjam Knörnschild. 2020. “Distress Calls of  
473 Nectarivorous Bats (*Glossophaga Soricina*) Encode Individual and Species Identity.” *Bioacoustics* 0 (0):  
474 1–19. <https://doi.org/10.1080/09524622.2020.1720815>.
- 475 Knörnschild, Mirjam, Volker Glöckner, and Otto von Helversen. 2010. “The Vocal Repertoire of Two Sym-  
476 patric Species of Nectar-Feeding Bats (*Glossophaga Soricina* and *G. Commissarisi*).” *Acta Chiropterologica*  
477 12 (1): 205–15. <https://doi.org/10.3161/150811010X504707>.
- 478 Lemke, Thomas O. 1984. “Foraging Ecology of the Long-Nosed Bat, *Glossophaga Soricina*, With Respect to  
479 Resource Availability.” *Ecology* 65 (2): 538–48. <https://doi.org/10.2307/1941416>.
- 480 ———. 1985. “Pollen Carrying by the Nectar-Feeding Bat *Glossophaga Soricina* in a Suburban Environment.”  
481 *Biotropica* 17 (2): 107–11. <https://doi.org/10.2307/2388502>.
- 482 Nachev, Vladislav, and York Winter. 2019. “Behavioral Repeatability and Choice Performance in Wild  
483 Free-Flying Nectarivorous Bats (*Glossophaga Commissarisi*).” *Behavioral Ecology and Sociobiology* 73 (2):  
484 24. <https://doi.org/10.1007/s00265-019-2637-4>.
- 485 Paton, David C., and F. Lynn Carpenter. 1984. “Peripheral Foraging by Territorial Rufous Hummingbirds:  
486 Defense by Exploitation.” *Ecology* 65 (6): 1808–19. <https://doi.org/10.2307/1937777>.
- 487 Rico-Guevara, A, M A Rubega, K J Hurme, and R Dudley. 2019. “Shifting Paradigms in the Mechanics  
488 of Nectar Extraction and Hummingbird Bill Morphology.” *Integrative Organismal Biology* 1 (oby006).  
489 <https://doi.org/10.1093/iob/oby006>.
- 490 Rose, Andreas, Miriam Kolar, Marco Tschapka, and Mirjam Knörnschild. 2016. “Learning Where to Feed:  
491 The Use of Social Information in Flower-Visiting Pallas’ Long-Tongued Bats (*Glossophaga Soricina*).”  
492 *Animal Cognition* 19 (2): 251–62. <https://doi.org/10.1007/s10071-015-0930-9>.
- 493 Rousseu, François, Yanick Charette, and Marc Bélisle. 2014. “Resource Defense and Monopolization in a  
494 Marked Population of Ruby-Throated Hummingbirds (*Archilochus Colubris*).” *Ecology and Evolution* 4  
495 (6): 776–93. <https://doi.org/https://doi.org/10.1002/ece3.972>.
- 496 Searcy, William A. 1979. “Morphological Correlates of Dominance in Captive Male Red-Winged Blackbirds.”  
497 *Condor* 81 (4): 417–20.
- 498 Senior, Paula, Roger K Butlin, and John D Altringham. 2005. “Sex and Segregation in Temperate Bats.”  
499 *Proceedings of the Royal Society B: Biological Sciences* 272 (1580): 2467–73. <https://doi.org/10.1098/rs>  
500 [pb.2005.3237](https://doi.org/10.1098/rs.pb.2005.3237).
- 501 So, Nina, Becca Franks, Sean Lim, and James P. Curley. 2015. “A Social Network Approach Reveals  
502 Associations Between Mouse Social Dominance and Brain Gene Expression.” *PLOS ONE* 10 (7): e0134509.  
503 <https://doi.org/10.1371/journal.pone.0134509>.
- 504 Stephenson, Alec, and Jeff Sonas. 2020. “PlayerRatings: Dynamic Updating Methods for Player Ratings  
505 Estimation.” <https://rdr.io/cran/PlayerRatings/>.
- 506 Team, R Core. 2021. “R: A Language and Environment for Statistical Computing.” Vienna, Austria: R  
507 Foundation for Statistical Computing. <http://www.R-project.org>.
- 508 Temeles, Ethan J., Robin S. Goldman, and Alexei U. Kudla. 2005. “Foraging and Territory Economics of  
509 Sexually Dimorphic Purple-Throated Caribs (*Eulampis Jugularis*) on Three Heliconia Morphs.” *The Auk*  
510 122 (1): 187–204. <https://doi.org/10.1093/auk/122.1.187>.
- 511 Temeles, Ethan J., and W. John Kress. 2010. “Mate Choice and Mate Competition by a Tropical Hummingbird  
512 at a Floral Resource.” *Proceedings of the Royal Society B: Biological Sciences* 277 (1687): 1607–13.  
513 <https://doi.org/10.1098/rspb.2009.2188>.
- 514 Thiele, Johannes, and York Winter. 2005. “Hierarchical Strategy for Relocating Food Targets in Flower Bats:  
515 Spatial Memory Versus Cue-Directed Search.” *Animal Behaviour* 69 (2): 315–27. <https://doi.org/10.1016/j.anbehav.2004.05.012>.
- 516

- 517 Tschapka, Marco. 2003. "Pollination of the Understorey Palm *Calyptrorhynchus Ghiesbreghtiana* by Hovering and  
518 Perching Bats." *Biological Journal of the Linnean Society* 80 (2): 281–88. <https://doi.org/10.1046/j.1095-8312.2003.00235.x>.  
519
- 520 Tschapka, Marco, and Otto von Helversen. 2007. "Phenology, Nectar Production and Visitation Behaviour  
521 of Bats on the Flowers of the Bromeliad *Werauhia Gladioliflora* in a Costa Rican Lowland Rain Forest." *Journal of Tropical Ecology* 23 (04): 385–95. <https://doi.org/10.1017/S0266467407004129>.  
522
- 523 Watzke, Steffen. 2006. "Nahrung Und Paarung – Vom „Kleinen“ Unterschied Der Ressourcennutzung  
524 Des Flughundes *Macroglossus Minimus* – Sind Blüten Mehr Als Nur Eine Nahrungsquelle?" In *Ressourcennutzung Und Paarungssystem Der Nektarivoren Flughundart *Macroglossus Minimus* (Pteropodidae: Macroglossinae) in West-Malaysia*, 82–171. Munich, Germany: Ludwig-Maximilians-Universität  
525 München. <https://edoc.ub.uni-muenchen.de/6174/>.  
526  
527
- 528 Winter, York, and Otto von Helversen. 2001. "Bats as Pollinators: Foraging Energetics and Floral  
529 Adaptations." In *Cognitive Ecology of Pollination: Animal Behaviour and Floral Evolution*, edited  
530 by James D. Thomson and Lars Chittka, 148–70. Cambridge: Cambridge University Press. <https://doi.org/10.1017/CBO9780511542268.009>.  
531
- 532 Winter, York, and Kai Petra Stich. 2005. "Foraging in a Complex Naturalistic Environment: Capacity of  
533 Spatial Working Memory in Flower Bats." *The Journal of Experimental Biology* 208 (Pt 3): 539–48.  
534 <https://doi.org/10.1242/jeb.01416>.
- 535 Wintergerst, Sabine. 2018. "Modulators of Foraging Behavior by Nectar-Feeding Bats (Glossophaginae)," January. <https://doi.org/10.18452/18673>.  
536
- 537 Wolf, Larry L., and F. Reed Hainsworth. 1971. "Time and Energy Budgets of Territorial Hummingbirds." *Ecology* 52 (6): 980–88. <https://doi.org/https://doi.org/10.2307/1933803>.  
538
- 539 Yasukawa, Ken. 1979. "Territory Establishment in Red-Winged Blackbirds: Importance of Aggressive  
540 Behavior and Experience." *The Condor* 81 (3): 258–64. <https://doi.org/10.2307/1367628>.
- 541 Yoh, Natalie, Peter Syme, Ricardo Rocha, Christoph F. J. Meyer, and Adrià López-Baucells. 2020. "Echolocation of Central Amazonian 'Whispering' Phyllostomid Bats: Call Design and Interspecific Variation." *Mammal Research* 65 (3): 583–97. <https://doi.org/10.1007/s13364-020-00503-0>.  
542  
543
